# Supplementary material for: Increased Collagen I/ Collagen III Ratio Is Associated with Hemorrhage in Brain Arteriovenous Malformations in Human and Mouse
Source: Preprints.org preprint supplement (doi:10.20944/preprints202312.0389.v1), 2023-12-06
Supplement: Supplementary file 1 [file supplementary]

Increased Collagen I/ Collagen III ratio is associated with hemorrhage in brain arteriovenous malformations in human and mouse

Zahra Shabani 1,2, Joana Schurger 1,2, Xiaonan Zhu1,2, Chaoliang Tang1,2, Li Ma1,2, Alka Yadav 1,2, Rich Liang 1,2, Kelly Press 1,2, Shantel Weinsheimer 1,2, Annika Schmidt 1,2, Calvin Wang 1,2, Abinav Sekhar 1,2, Helen Kim 1,2, and Hua Su 1,2*

|  |
| --- |

1Center for Cerebrovascular Research, University of California, San Francisco, San Francisco, CA, United States.

2Department of Anesthesia and Perioperative Care, University of California, San Francisco, San Francisco, CA, United States.

**
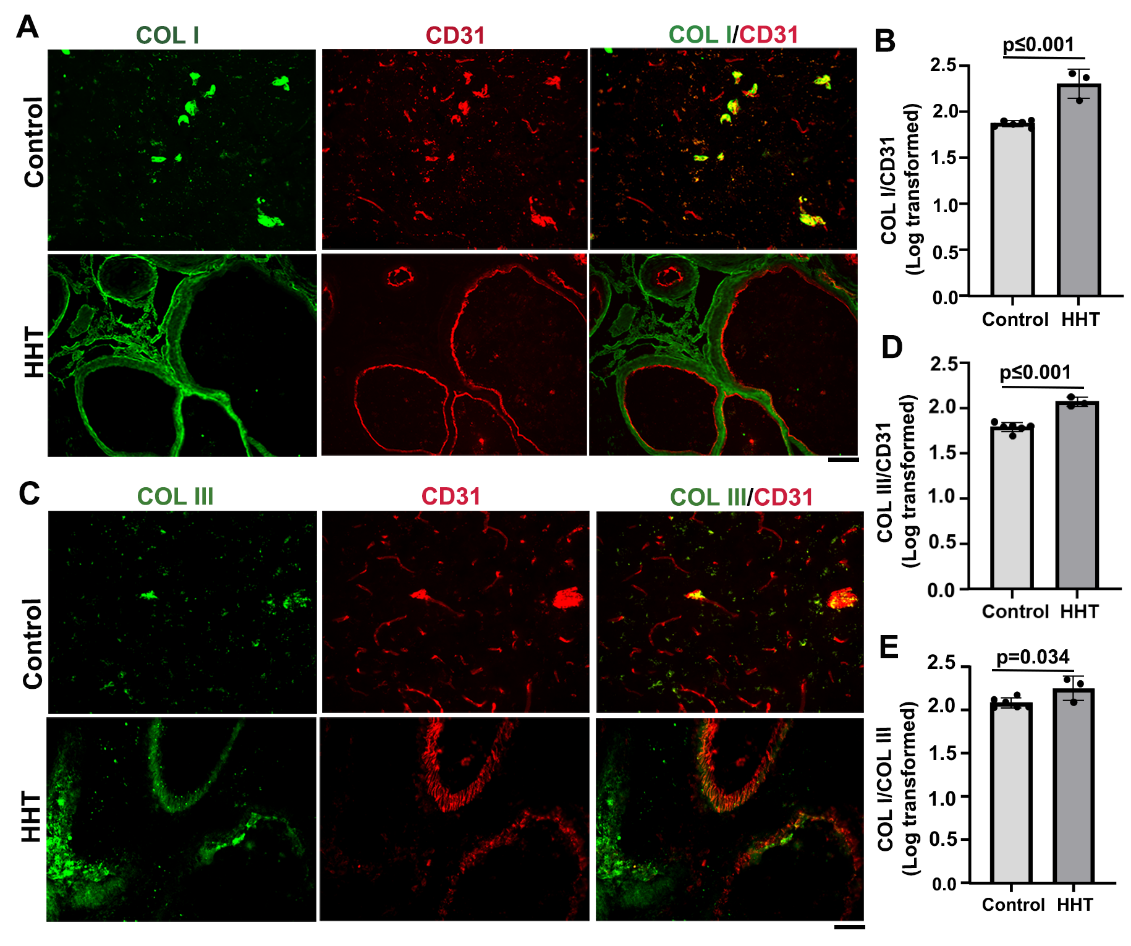
**

**Supplementary Figure 1: COL I and COL III levels and COL I/ COL III ratio are higher in human HHT bAVMs compared to control. A & C. Representative images of COL I (green) and COL III (green). stained sections. ECs (red) were stained by an anti-CD31 antibody. Scale bar=50 µm. B & D. Quantifications of COL I and COL III levels. E. Quantification of COL I/COL III ratio. N=6 for control, N=3 for HHT bAVMs.**
